# Supplementary material for: Optimising Puppy Socialisation–Short- and Long-Term Effects of a Training Programme during the Early Socialisation Period
Source: MDPI journal article supplement (doi:10.3390/ani12223067), 2022-11-08
Supplement: s1 [file s1]

**Table S1.** Demographic details of the subjects.

| Nr. | Litter      | ID            | Sex    | Treatment | Breed                    | Age at test (days) |
|-----|-------------|---------------|--------|-----------|--------------------------|--------------------|
| 1   | Sheltie1    | Sheltie1 1    | female | control   | Shetland Sheepdog        | 43                 |
| 2   | Sheltie1    | Sheltie1 2    | female | control   | Shetland Sheepdog        | 43                 |
| 3   | Sheltie1    | Sheltie1 3    | male   | training  | Shetland Sheepdog        | 43                 |
| 4   | Sheltie1    | Sheltie1 4    | female | training  | Shetland Sheepdog        | 43                 |
| 5   | Sheltie2    | Sheltie2 1    | female | training  | Shetland Sheepdog        | 51                 |
| 6   | Sheltie2    | Sheltie2 2    | male   | control   | Shetland Sheepdog        | 51                 |
| 7   | Sheltie2    | Sheltie2 3    | male   | training  | Shetland Sheepdog        | 51                 |
| 8   | Sheltie2    | Sheltie2 4    | male   | training  | Shetland Sheepdog        | 51                 |
| 9   | Sheltie2    | Sheltie2 5    | male   | control   | Shetland Sheepdog        | 51                 |
| 10  | MiniAussie1 | MiniAussie1 1 | male   | control   | Mini Australian Shepherd | 41                 |
| 11  | MiniAussie1 | MiniAussie1 2 | female | training  | Mini Australian Shepherd | 41                 |
| 12  | MiniAussie1 | MiniAussie1 3 | female | control   | Mini Australian Shepherd | 41                 |
| 13  | MiniAussie1 | MiniAussie1 4 | male   | control   | Mini Australian Shepherd | 41                 |
| 14  | MiniAussie1 | MiniAussie1 5 | female | training  | Mini Australian Shepherd | 41                 |
| 15  | MiniAussie1 | MiniAussie1 6 | female | control   | Mini Australian Shepherd | 41                 |
| 16  | MiniAussie1 | MiniAussie1 7 | male   | training  | Mini Australian Shepherd | 41                 |
| 17  | Aussie1     | Aussie1 1     | female | control   | Australian Shepherd      | 40                 |
| 18  | Aussie1     | Aussie1 2     | female | training  | Australian Shepherd      | 40                 |
| 19  | Aussie1     | Aussie1 3     | female | training  | Australian Shepherd      | 40                 |
| 20  | Aussie1     | Aussie1 4     | male   | control   | Australian Shepherd      | 40                 |
| 21  | Aussie2     | Aussie2 1     | female | control   | Australian Shepherd      | 46                 |
| 22  | Aussie2     | Aussie2 2     | female | control   | Australian Shepherd      | 46                 |
| 23  | Aussie2     | Aussie2 3     | female | control   | Australian Shepherd      | 46                 |
| 24  | Aussie2     | Aussie2 4     | female | training  | Australian Shepherd      | 46                 |

|    |           |             |        |          |                     |    |
|----|-----------|-------------|--------|----------|---------------------|----|
| 25 | Aussie2   | Aussie2 5   | female | training | Australian Shepherd | 46 |
| 26 | Aussie2   | Aussie2 6   | female | training | Australian Shepherd | 46 |
| 27 | Aussie2   | Aussie2 7   | female | training | Australian Shepherd | 46 |
| 28 | Aussie3   | Aussie3 1   | male   | control  | Australian Shepherd | 46 |
| 29 | Aussie3   | Aussie3 2   | female | training | Australian Shepherd | 46 |
| 30 | Aussie3   | Aussie3 3   | male   | training | Australian Shepherd | 46 |
| 31 | Aussie3   | Aussie3 4   | female | control  | Australian Shepherd | 46 |
| 32 | Aussie3   | Aussie3 5   | female | control  | Australian Shepherd | 46 |
| 33 | Aussie3   | Aussie3 6   | male   | control  | Australian Shepherd | 46 |
| 34 | Aussie3   | Aussie3 7   | female | training | Australian Shepherd | 46 |
| 35 | Aussie3   | Aussie3 8   | male   | training | Australian Shepherd | 46 |
| 36 | Aussie4   | Aussie4 1   | female | training | Australian Shepherd | 48 |
| 37 | Aussie4   | Aussie4 2   | female | control  | Australian Shepherd | 48 |
| 38 | Aussie4   | Aussie4 3   | male   | training | Australian Shepherd | 48 |
| 39 | Aussie4   | Aussie4 4   | male   | control  | Australian Shepherd | 48 |
| 40 | Aussie4   | Aussie4 5   | female | control  | Australian Shepherd | 48 |
| 41 | Aussie4   | Aussie4 6   | male   | control  | Australian Shepherd | 48 |
| 42 | Aussie4   | Aussie4 7   | male   | training | Australian Shepherd | 48 |
| 43 | Labrador1 | Labrador1 1 | female | control  | Labrador Retriever  | 41 |
| 44 | Labrador1 | Labrador1 2 | male   | training | Labrador Retriever  | 41 |
| 45 | Labrador1 | Labrador1 3 | male   | control  | Labrador Retriever  | 41 |
| 46 | Labrador1 | Labrador1 4 | male   | control  | Labrador Retriever  | 41 |
| 47 | Labrador1 | Labrador1 5 | female | training | Labrador Retriever  | 41 |
| 48 | Labrador1 | Labrador1 6 | female | training | Labrador Retriever  | 41 |
| 49 | Labrador1 | Labrador1 7 | male   | training | Labrador Retriever  | 41 |
| 50 | Labrador1 | Labrador1 8 | female | control  | Labrador Retriever  | 41 |
| 51 | Labrador1 | Labrador1 9 | female | training | Labrador Retriever  | 41 |
| 52 | Herder1   | Herder1 1   | female | control  | Dutch Shepherd      | 41 |
| 53 | Herder1   | Herder1 2   | female | control  | Dutch Shepherd      | 41 |
| 54 | Herder1   | Herder1 3   | female | training | Dutch Shepherd      | 41 |
| 55 | Herder1   | Herder1 4   | male   | training | Dutch Shepherd      | 41 |

|    |            |              |        |          |                          |    |
|----|------------|--------------|--------|----------|--------------------------|----|
| 56 | Herder1    | Herder1 5    | male   | training | Dutch Shepherd           | 41 |
| 57 | Herder1    | Herder1 6    | female | control  | Dutch Shepherd           | 41 |
| 58 | Herder1    | Herder1 7    | female | training | Dutch Shepherd           | 41 |
| 59 | Herder1    | Herder1 8    | male   | control  | Dutch Shepherd           | 41 |
| 60 | Pitbull1   | Pitbull1 1   | female | training | American Pitbull Terrier | 41 |
| 61 | Pitbull1   | Pitbull1 2   | male   | training | American Pitbull Terrier | 41 |
| 62 | Pitbull1   | Pitbull1 3   | male   | training | American Pitbull Terrier | 41 |
| 63 | Pitbull1   | Pitbull1 4   | female | control  | American Pitbull Terrier | 41 |
| 64 | Pitbull1   | Pitbull1 5   | male   | control  | American Pitbull Terrier | 41 |
| 65 | Pitbull1   | Pitbull1 6   | male   | control  | American Pitbull Terrier | 41 |
| 66 | Pitbull1   | Pitbull1 7   | female | control  | American Pitbull Terrier | 41 |
| 67 | Pitbull1   | Pitbull1 8   | female | control  | American Pitbull Terrier | 41 |
| 68 | Pitbull1   | Pitbull1 9   | male   | control  | American Pitbull Terrier | 41 |
| 69 | Pitbull1   | Pitbull1 10  | male   | training | American Pitbull Terrier | 41 |
| 70 | Pitbull1   | Pitbull1 11  | female | training | American Pitbull Terrier | 41 |
| 71 | Icelandic1 | Icelandic1 1 | female | training | Icelandic Sheepdog       | 42 |
| 72 | Icelandic1 | Icelandic1 2 | male   | control  | Icelandic Sheepdog       | 42 |
| 73 | Icelandic1 | Icelandic1 3 | female | control  | Icelandic Sheepdog       | 42 |
| 74 | Icelandic1 | Icelandic1 4 | male   | training | Icelandic Sheepdog       | 42 |
| 75 | Icelandic1 | Icelandic1 5 | male   | training | Icelandic Sheepdog       | 42 |
| 76 | Icelandic1 | Icelandic1 6 | female | control  | Icelandic Sheepdog       | 42 |
| 77 | Setter1    | Setter1 1    | female | training | English Setter           | 43 |
| 78 | Setter1    | Setter1 2    | male   | control  | English Setter           | 43 |

|    |         |           |        |          |                |    |
|----|---------|-----------|--------|----------|----------------|----|
| 79 | Setter1 | Setter1 3 | female | training | English Setter | 43 |
| 80 | Setter1 | Setter1 4 | male   | training | English Setter | 43 |
| 81 | Setter1 | Setter1 5 | female | control  | English Setter | 43 |
| 82 | Setter1 | Setter1 6 | female | control  | English Setter | 43 |
| 83 | Setter1 | Setter1 7 | female | training | English Setter | 43 |
